# Supplementary material
Source: MDPI journal article supplement (https://www.mdpi.com/2306-5338/10/7/156)
Supplement: s1 [file s1]

Archive with 1 entries (1 files):
- hydrology-2501304-supplementary.pdf
