# Supplementary material
Source: MDPI journal article supplement (https://www.mdpi.com/2306-5338/10/7/156)
Supplement: s1 [file s1 › hydrology-2501304-supplementary.pdf]

Supplemental Materials

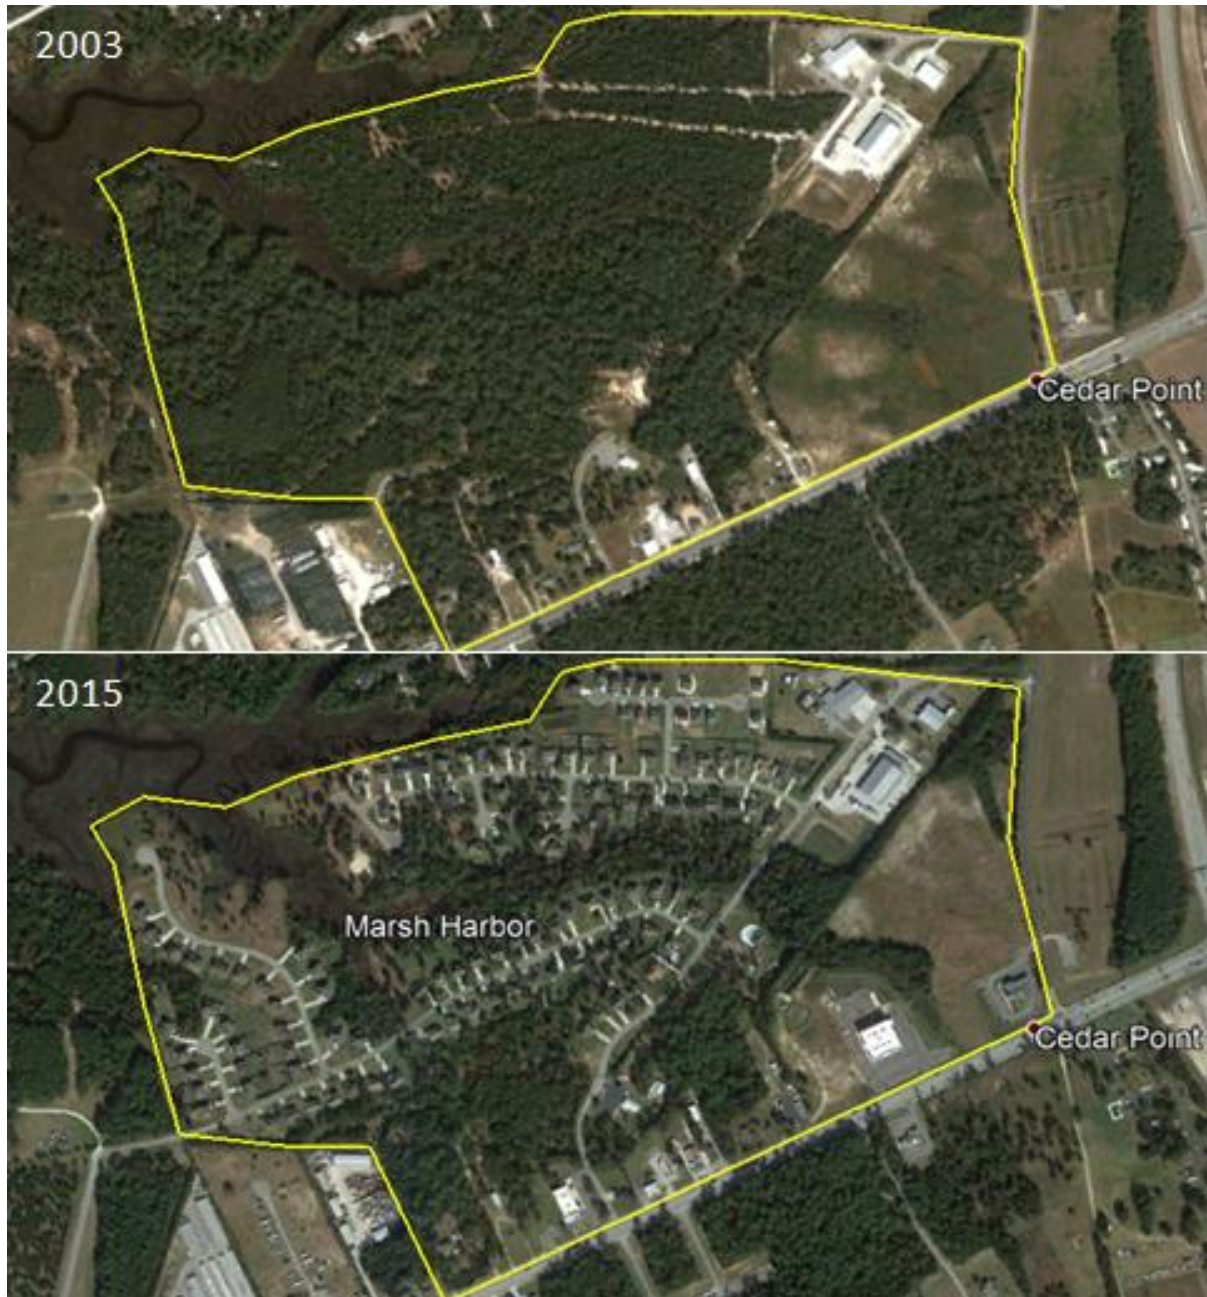

Marsh Harbor community within the Boat House Creek Watershed in 2003 (top) and 2015 (bottom) showing extensive development over the 12 year period.

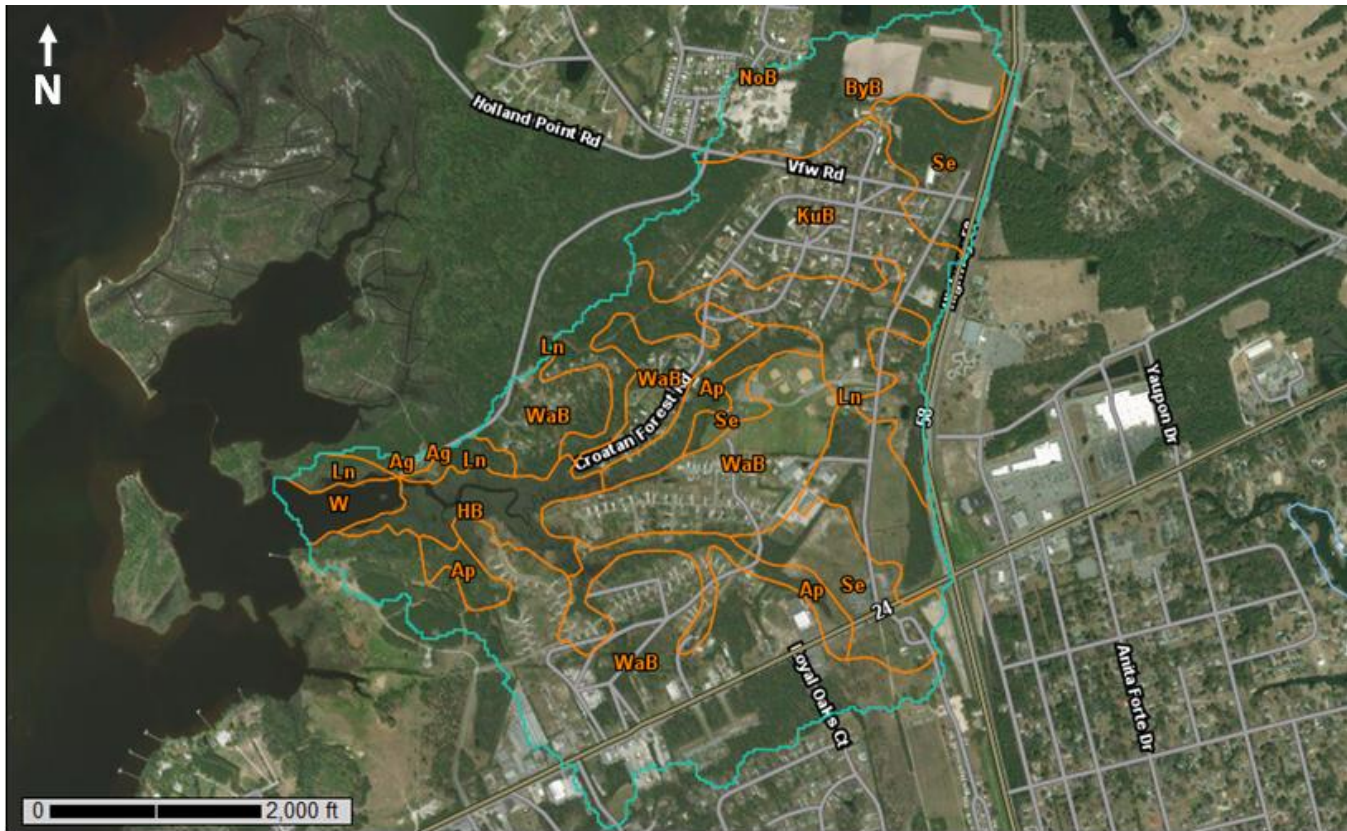

Soils map (top) and table showing main soil series in the Boat House Creek Watershed.
